# Supplementary material for: Exploring the Mechanisms of Dust Emission and Transport based on Observations and GEOS-Chem Simulations
Source: Copernicus journal article supplement (doi:10.5194/egusphere-2025-6550), 2026-01-15
Supplement: Supplementary file 1 [file egusphere-2025-6550-supplement.pdf]

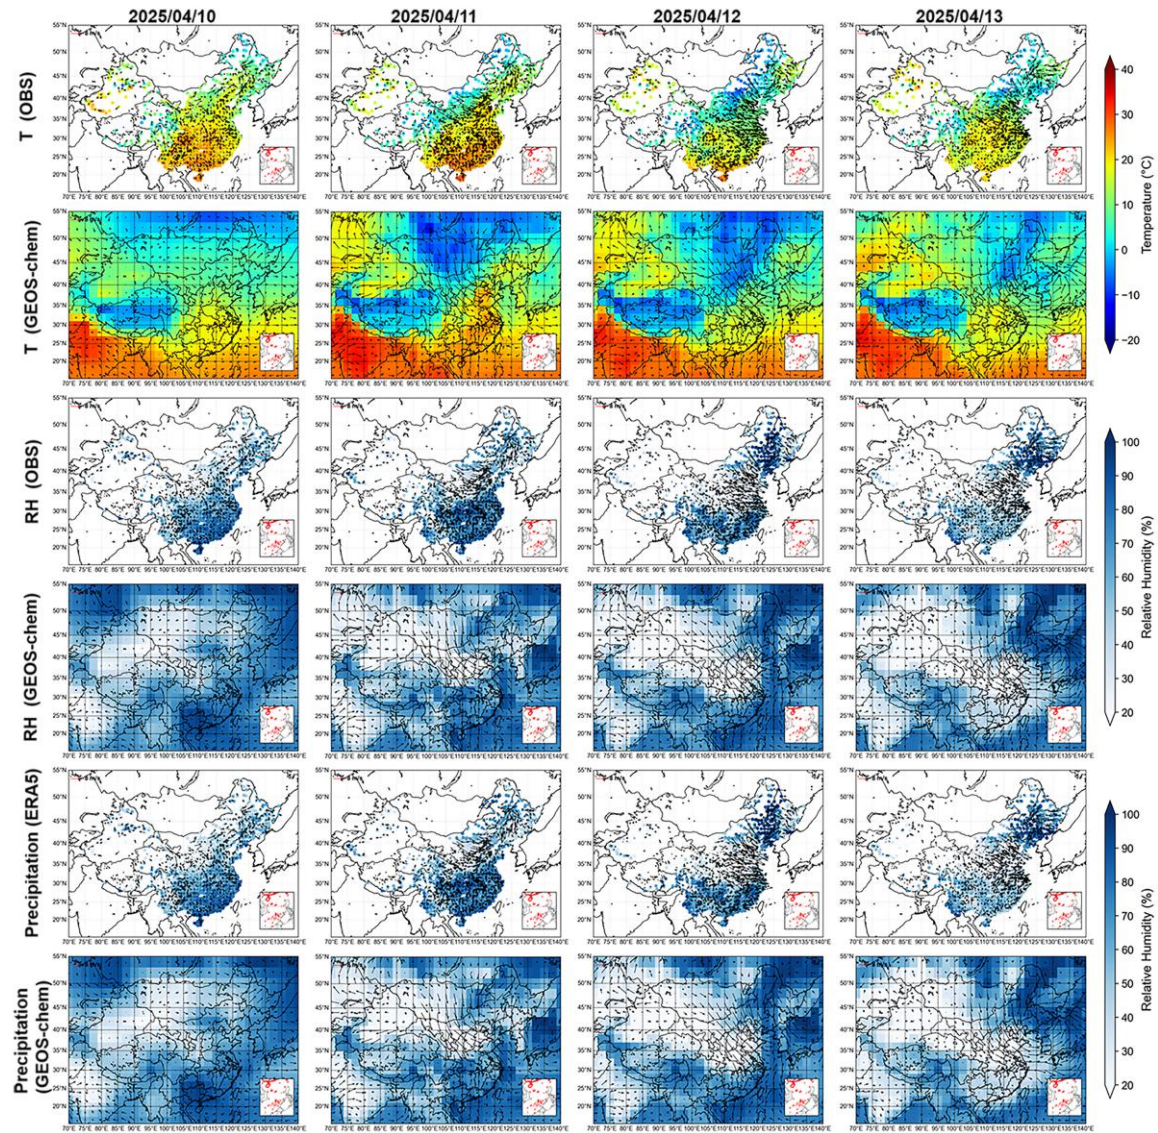

Figure S1. Comparative analysis of meteorological conditions between observations and model simulations over China during the dust event in April 2025, including daily mean temperature (T, unit:  $^{\circ}\text{C}$ ), daily mean relative humidity (RH, unit: %), hourly total precipitation (Precipitation, unit: mm) and wind fields during 10-13 April 2025 BJT. Due to the lack of station-based precipitation observations, ERA5 reanalysis data are used for comparison in precipitation.



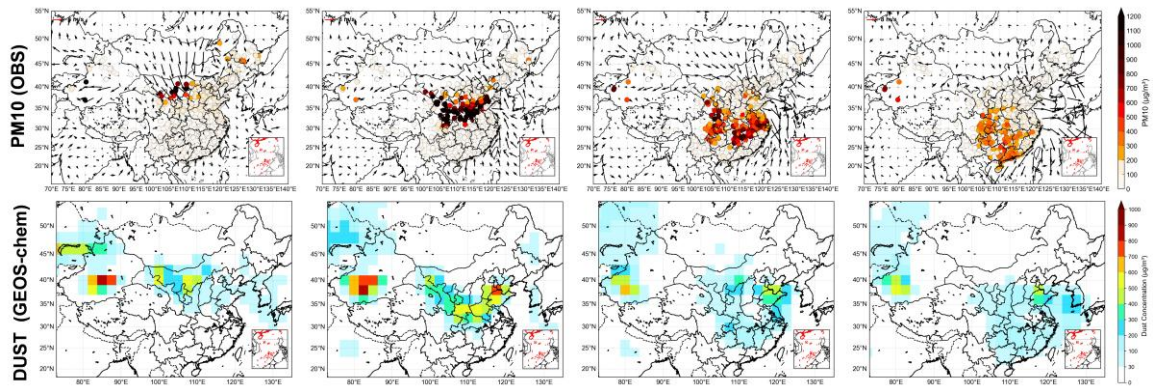

Figure S2. comparisons of simulated dust aerosol concentration ( $\mu\text{g}/\text{m}^3$ ) with observed  $\text{PM}_{10}$  concentration ( $\mu\text{g}/\text{m}^3$ ) and AOD spatial distributions during 11-13 April 2025 BJT. The observational meteorological data are obtained from surface stations, while  $\text{PM}_{10}$  concentration data are sourced from air quality monitoring stations.

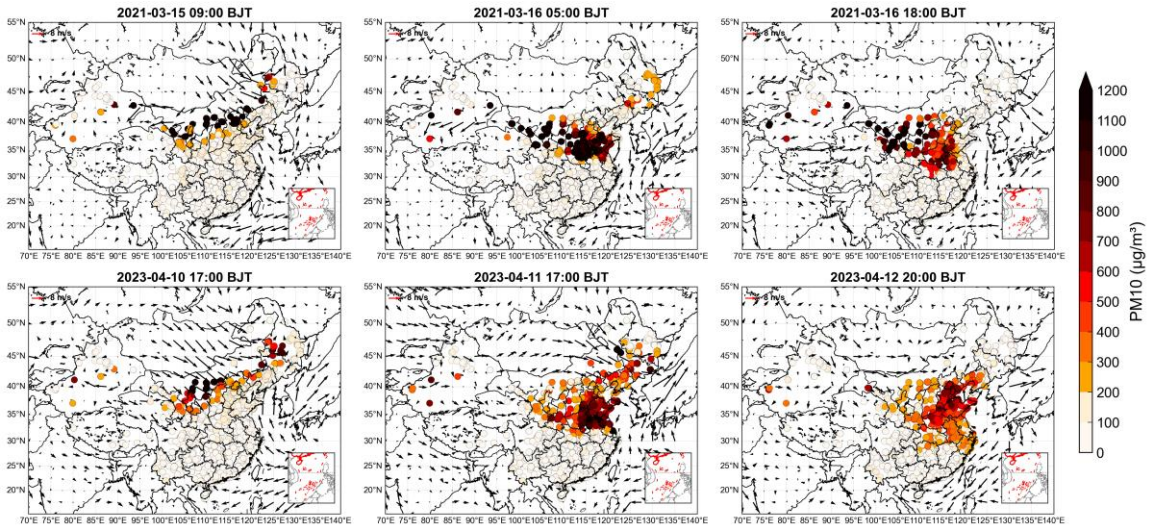

Figure S3.  $\text{PM}_{10}$  concentration ( $\mu\text{g}/\text{m}^3$ ) variations during the severe dust storm event over China in March 2021 and during the severe dust storm event in April 2023.
